# Supplementary material
Source: Royal Society of Chemistry journal article supplement (doi:10.1039/d6qm00089d)
Supplement: d6qm00089d1.pdf [file d6qm00089d1.pdf]

## Supplementary Information

### Hydrophobic Low-Polarity Perfluorobutanesulfonate Shield Enables Dendrite-Free Aqueous Zn-Ion Batteries

Jiazhi Geng<sup>a</sup>, Xiaolang Liu<sup>a</sup>, Runming Tao<sup>b</sup>, Gaoxu Huang<sup>a</sup>, Yuxi Yang<sup>a</sup>, Haifeng Li<sup>a</sup>, Deyu Wang<sup>a</sup>,  
Zhihong Liu<sup>a</sup> and Jiyuan Liang<sup>\*a</sup>

- a. Key Laboratory of Flexible Optoelectronic Materials and Technology, Ministry of Education, School of Optoelectronic Materials & Technology, Jianghan University, Wuhan, 430056, Hubei, China. E-mail: [liangjy@jhun.edu.cn](mailto:liangjy@jhun.edu.cn)
- b. Independent Researcher, Darien, IL, 60561, USA

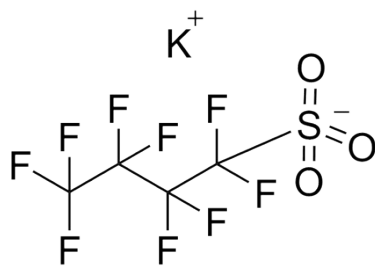

**Figure S1.** Structural formula of potassium perfluorobutanesulfonate.

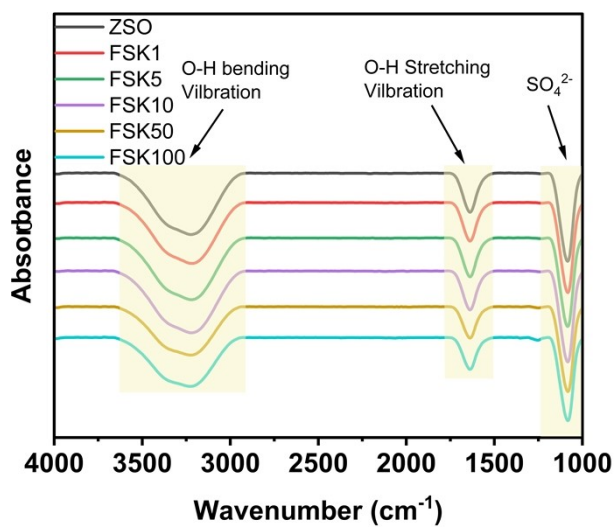

**Figure S2.** FTIR spectra of various electrolytes.

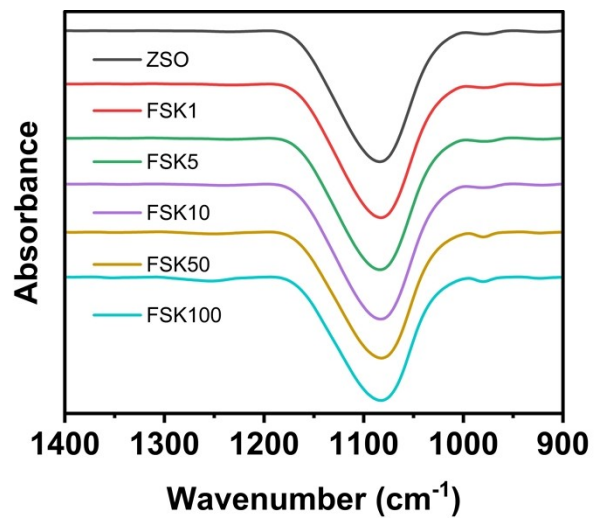

**Figure S3.** FTIR spectra of  $\nu(\text{SO}_4^{2-})$  in various electrolytes.

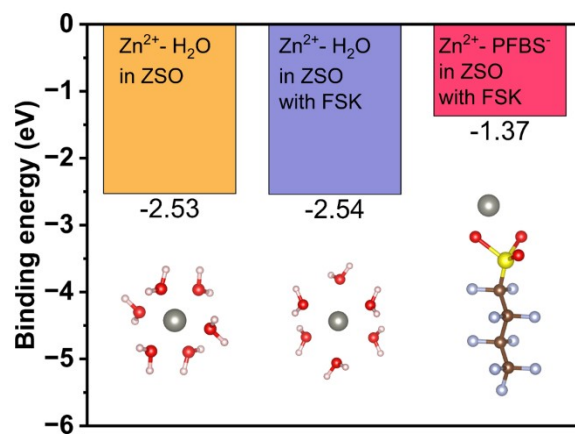

**Figure S4.** Binding energies of  $\text{Zn}^{2+}\text{-H}_2\text{O}$  in ZSO,  $\text{Zn}^{2+}\text{-H}_2\text{O}$  in ZSO with FSK, and  $\text{Zn}^{2+}\text{-PFBS}^-$  in ZSO with FSK.

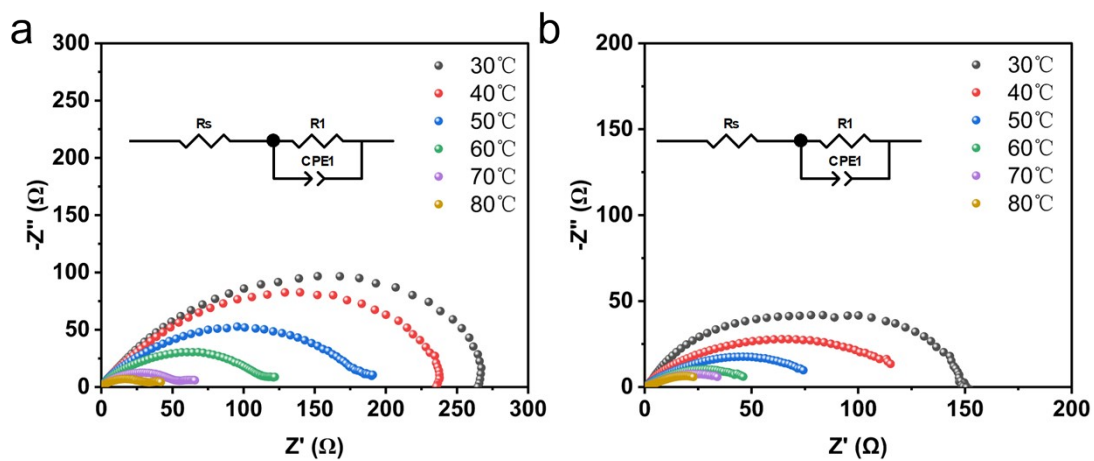

**Figure S5.** Nyquist plots of the Zn||Zn symmetric cell at various temperatures (a) in ZSO electrolyte and (b) in FSK50 electrolyte.

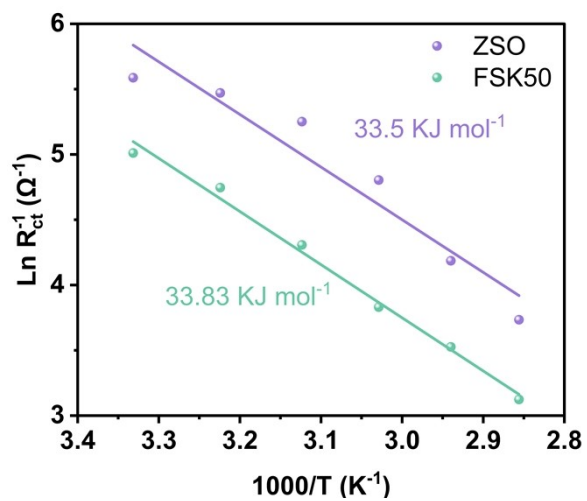

**Figure S6.** Arrhenius curves and comparison of activation energies.

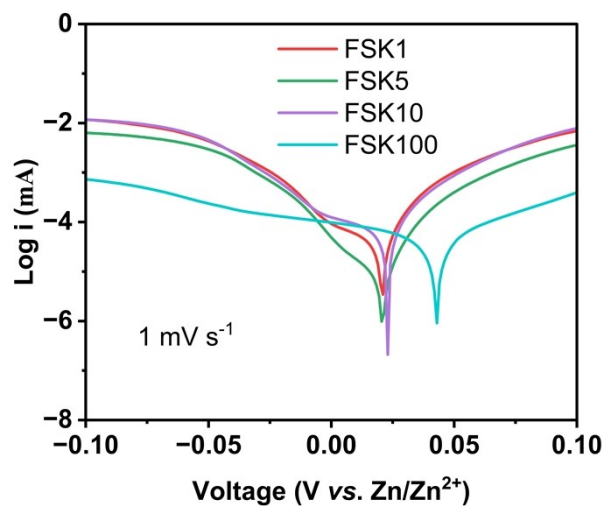

**Figure S7.** Tafel plots of the Zn electrode in FSK1, FSK5, FSK10 and FSK100 at 1 mV s<sup>-1</sup> using Zn||Zn symmetrical cells.

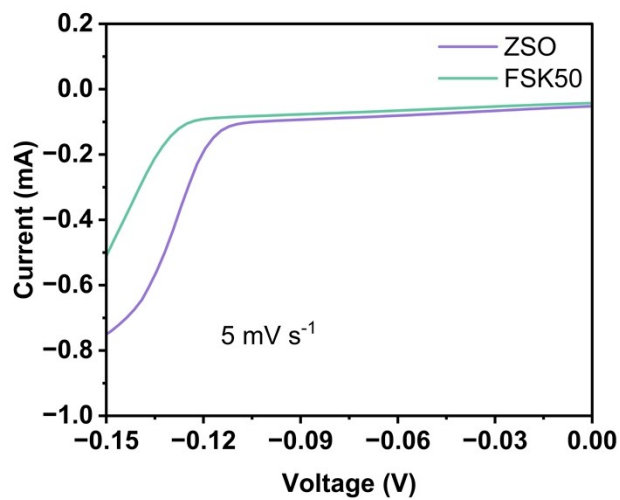

**Figure S8.** Linear sweep voltammetry (LSV) curves at 5 mV s<sup>-1</sup> in the Na<sub>2</sub>SO<sub>4</sub> electrolytes with/without FSK.

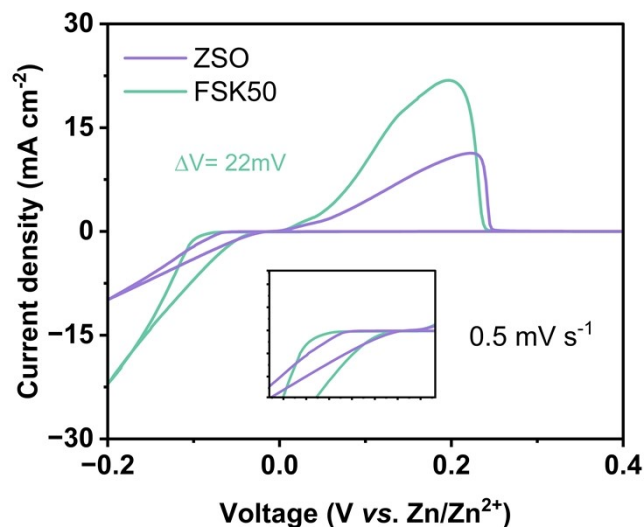

Figure S9. CV curves for Zn||Cu cells at  $0.5 \text{ mV s}^{-1}$ .

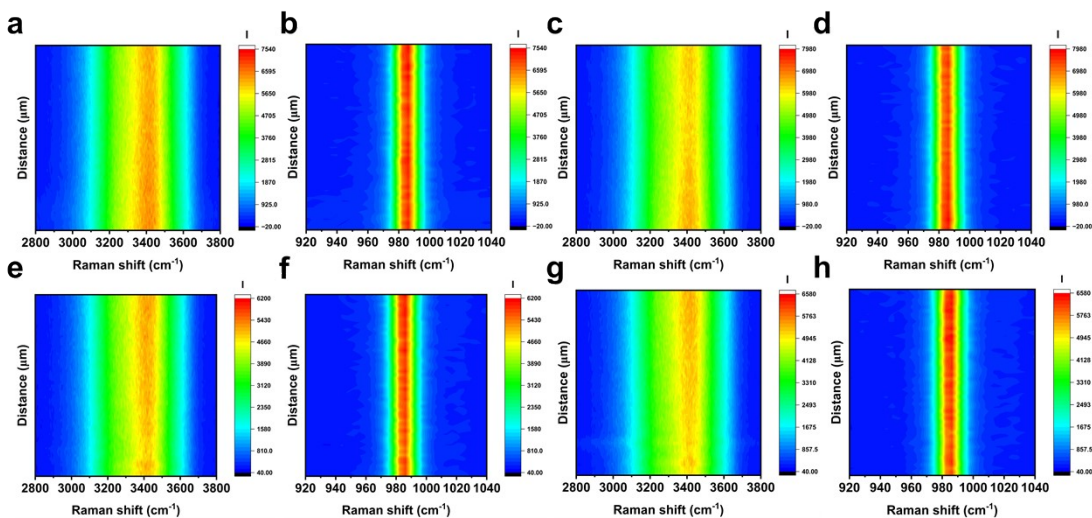

Figure S10. In situ Raman spectra of ZSO at  $5 \text{ mA cm}^{-2}$  and  $10 \text{ mAh cm}^{-2}$ : (a)  $\nu(\text{OH})$ , (b)  $\nu(\text{SO}_4^{2-})$ , under open-circuit conditions: (c)  $\nu(\text{OH})$ , (d)  $\nu(\text{SO}_4^{2-})$ . In situ Raman spectra of FSK at  $5 \text{ mA cm}^{-2}$  and  $10 \text{ mAh cm}^{-2}$ : (e)  $\nu(\text{OH})$ , (f)  $\nu(\text{SO}_4^{2-})$ , under open-circuit conditions: (g)  $\nu(\text{OH})$ , (h)  $\nu(\text{SO}_4^{2-})$ .

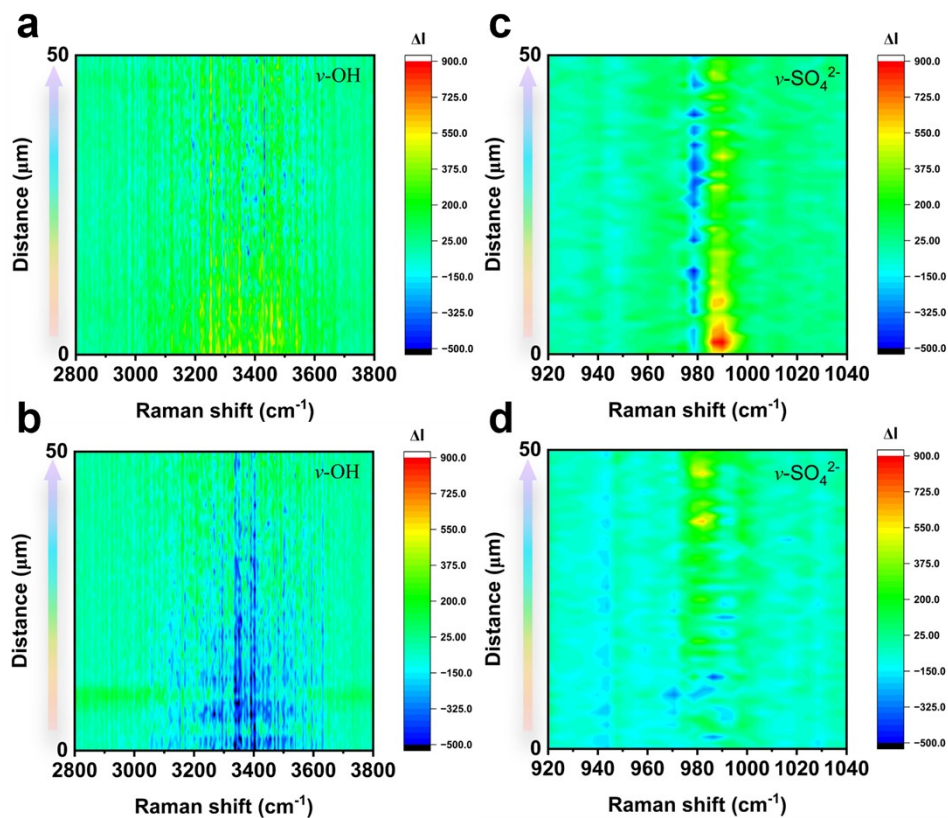

**Figure S11.** In situ Raman difference spectra of  $\nu(\text{OH})$  at the electrode/electrolyte interface under open-circuit conditions: (a) ZSO electrolyte, (b) FSK50 electrolyte;  $\nu(\text{SO}_4^{2-})$ : (c) ZSO electrolyte, (d) FSK50 electrolyte.

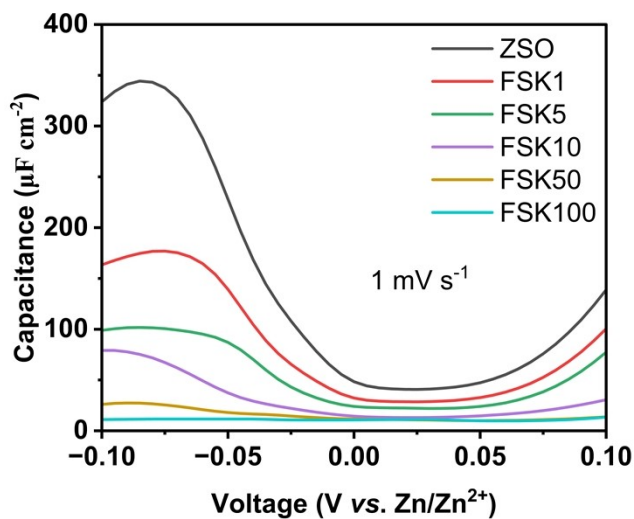

**Figure S12.** Differential capacity curves of Zn||Zn symmetric cells at the scan rate of  $1 \text{ mV s}^{-1}$  in various

electrolyte.

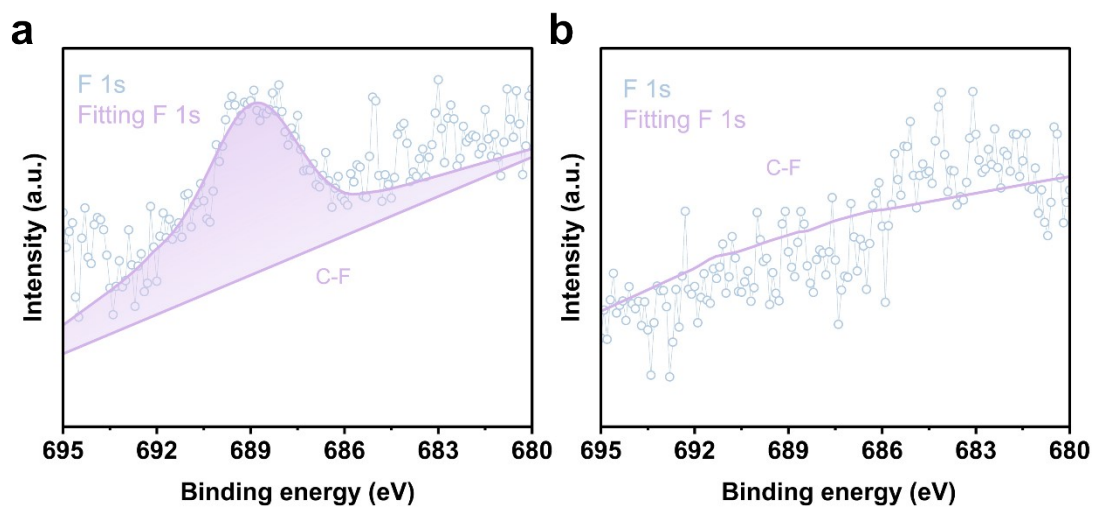

Figure S13. HRXPS spectra of F 1s for Zn anode in (a) FSK50 and (b) ZSO.

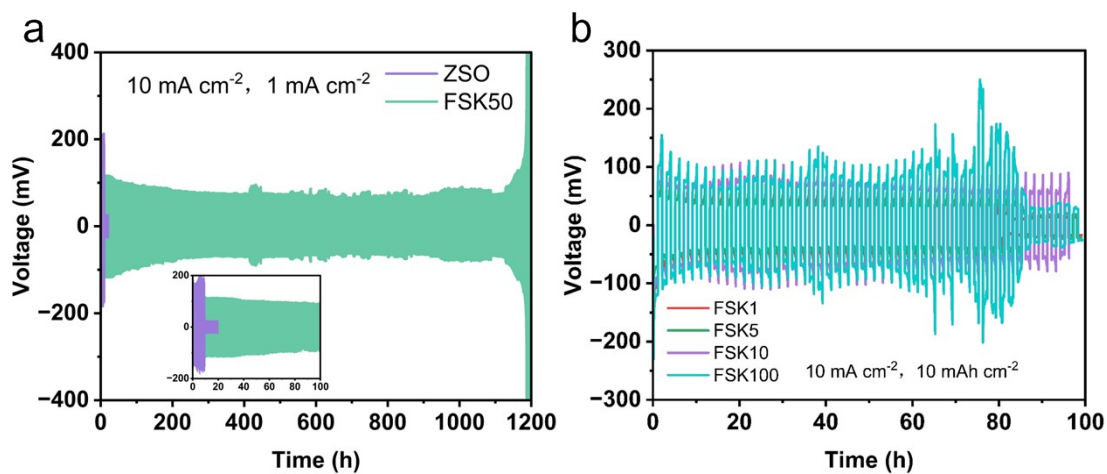

Figure S14. The cycling performance the Zn||Zn symmetrical cell (a) in ZSO and FSK50 at 10 mA cm<sup>-2</sup> and 1 mA h cm<sup>-2</sup>, (b) in FSK1, FSK5, FSK10 and FSK100 at 10 mA cm<sup>-2</sup> and 10 mA h cm<sup>-2</sup>.

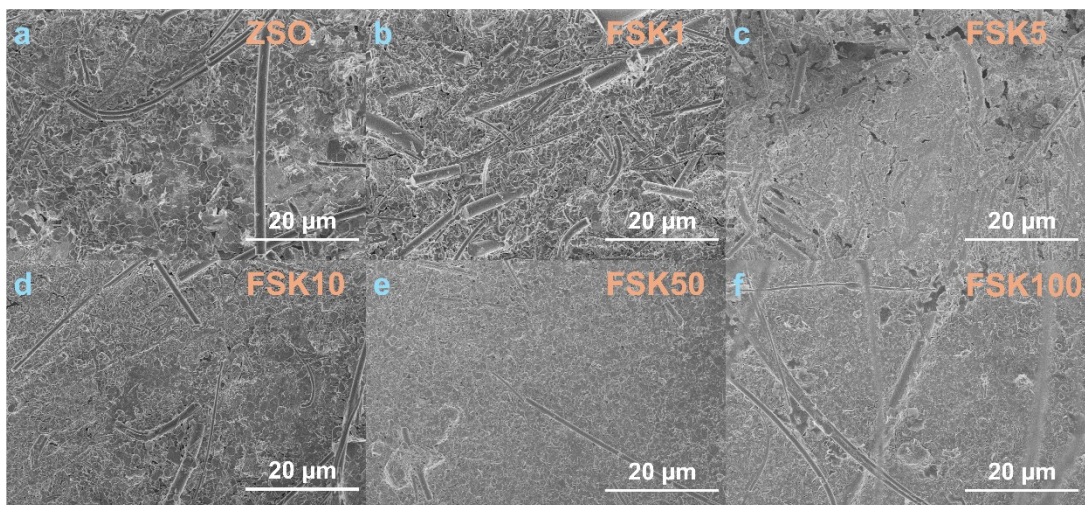

**Figure S15.** SEM image of Zn||Zn symmetric cells with (a) ZSO, (b)FSK1, (c) FSK5, (d) FSK10, (e) FSK50 and (f) FSK100 after 50 cycles at 1 mA cm<sup>-2</sup> and 1 mAh cm<sup>-2</sup>

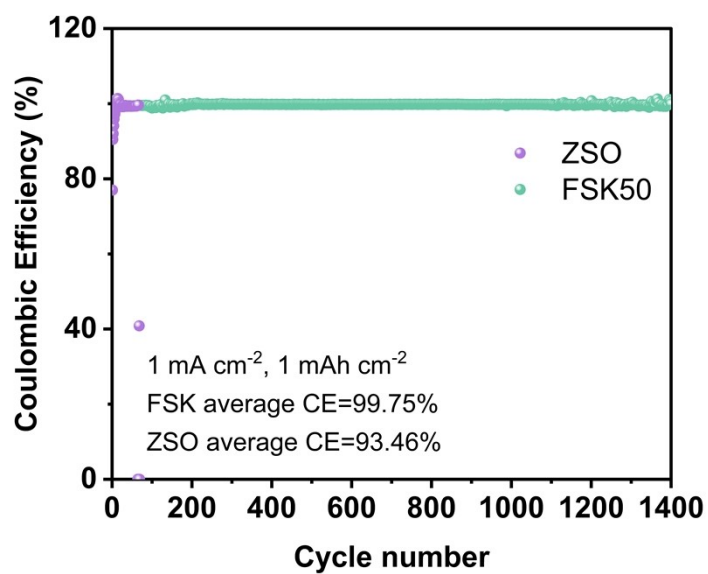

**Figure S16.** Coulombic efficiency of different cells at 1 mA cm<sup>-2</sup> and 1 mAh cm<sup>-2</sup>.

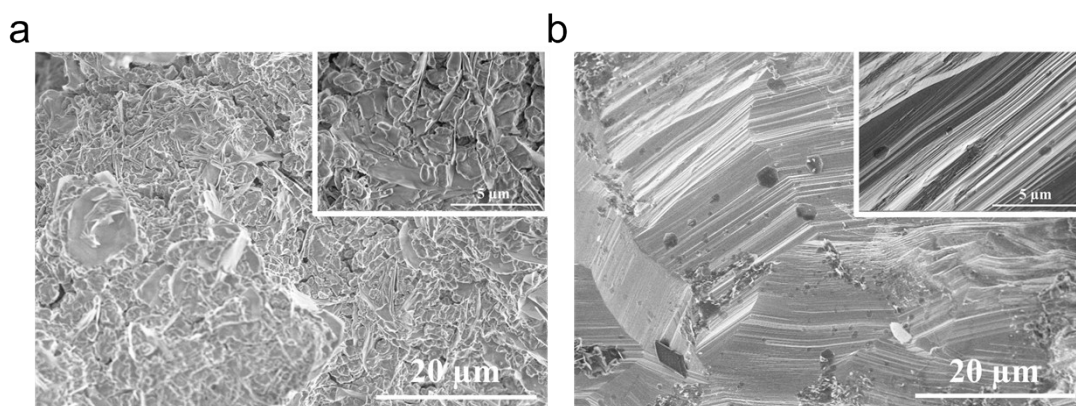

**Figure S17.** SEM images of Zn plating at 5 mA cm<sup>-2</sup> and 10 mAh cm<sup>-2</sup> on the surfaces of (a) ZSO and (b) FSK50.

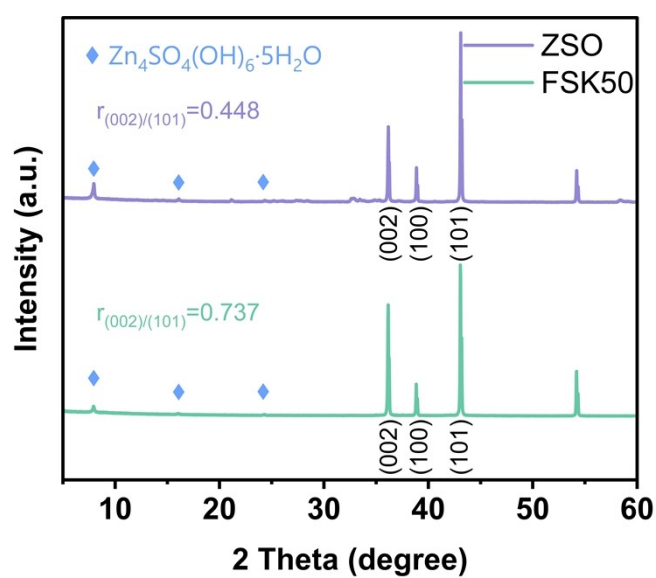

**Figure S18.** XRD patterns of different Zn electrodes after Zn plating at 5 mA cm<sup>-2</sup> and 10 mAh cm<sup>-2</sup> in ZSO and FSK50, respectively.

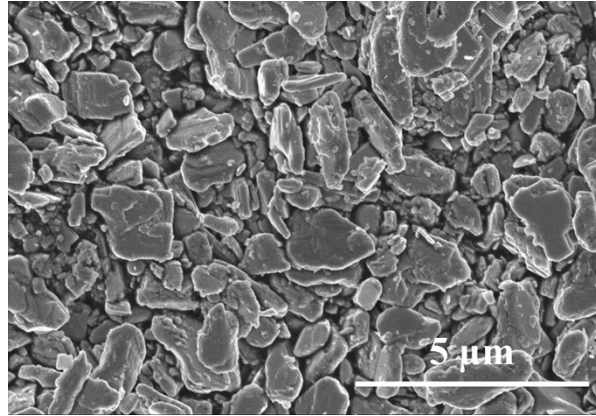

**Figure S19.** SEM image of V<sub>2</sub>O<sub>5</sub> powder.

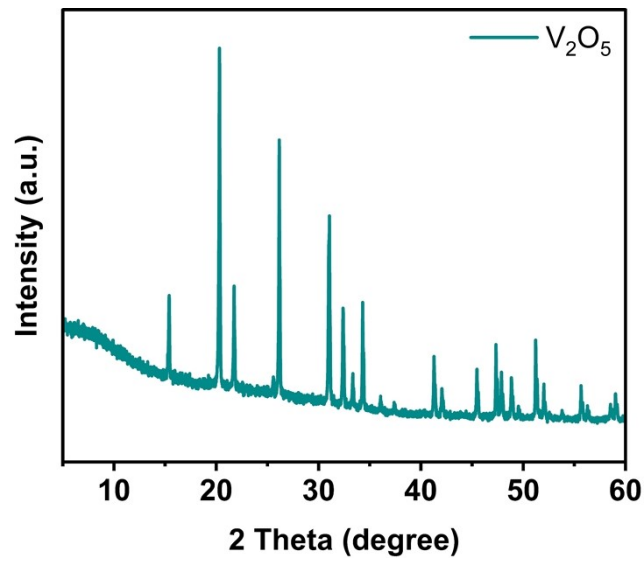

**Figure S20.** XRD pattern of V<sub>2</sub>O<sub>5</sub> powder.

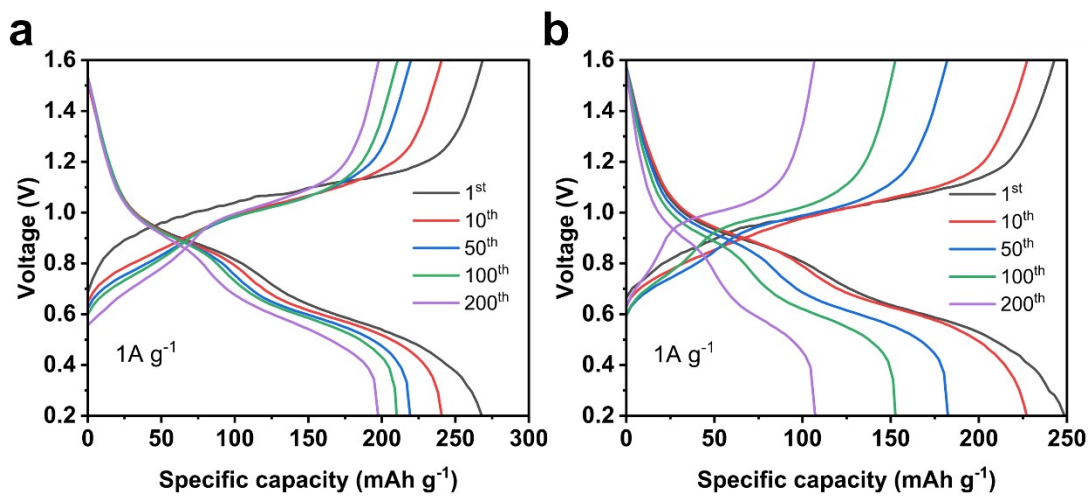

Figure S21. GCD curve of (a) cell with FSK50 and (b) cell with ZSO.

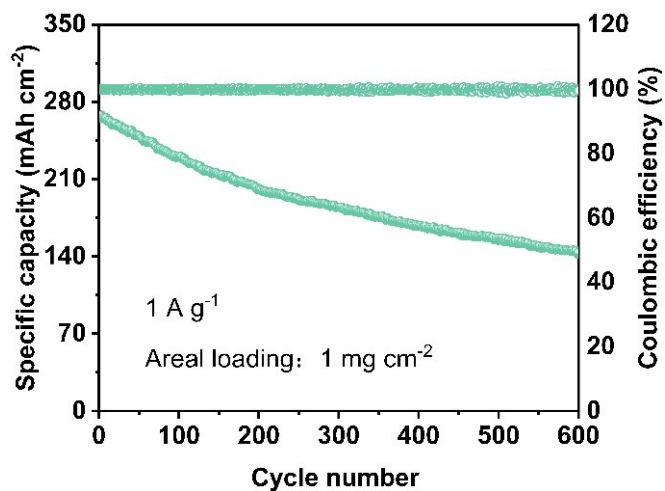

Figure S22. Long-term cycling performance of Zn||V<sub>2</sub>O<sub>5</sub> full cells with FSK50 after standing for 7 days.

**Table S1.** Performance comparison of this work with other previous reports.

| Modification strategies          | Current density (mA cm <sup>-2</sup> ),<br>Areal capacity (mAh cm <sup>-2</sup> ) | Cycle life (h) | Ref.      |
|----------------------------------|-----------------------------------------------------------------------------------|----------------|-----------|
| CH@AGM                           | 1, 1                                                                              | 110            | 1         |
| Carboxymethyl cellulose          | 1, 1                                                                              | 1050           | 2         |
| $\beta$ -CD                      | 5, 5                                                                              | 350            | 3         |
| TBA <sub>2</sub> SO <sub>4</sub> | 10, 2                                                                             | 400            | 4         |
| ZF@F-TiO <sub>2</sub>            | 1, 1                                                                              | 460            | 5         |
| Trehalose                        | 5, 2.5                                                                            | 200            | 6         |
| Saccharin                        | 10, 10                                                                            | 550            | 7         |
| Sodium citrate                   | 5, 2                                                                              | 850            | 8         |
| Ammonium succinate (AS)          | 10, 2                                                                             | 1230           | 9         |
| Zn@KL                            | 4.4, 1.1                                                                          | 800            | 10        |
| DMSO                             | 0.5, 0.5                                                                          | 1000           | 11        |
| Locust bean gum (LBG)            | 2, 2                                                                              | 1160           | 12        |
| Zn@ZnS                           | 2, 2                                                                              | 1125           | 13        |
| EG                               | 2, 1                                                                              | 140            | 14        |
| FSK                              | 1, 1                                                                              | 1500           | This work |
|                                  | 10, 1                                                                             | 1200           |           |

## Reference

1. J. Zhi, S. Li, M Han and P Chen, Biomolecule-guided cation regulation for dendrite-free metal anodes, *Sci. Adv.*, 2020, **6(32)**, eabb1342.
2. Y. Xiong, Q. Li, K. Luo, L. Zhong, G. Li, S. Zhong and D. Yan, Low cost carboxymethyl cellulose additive toward stable zinc anodes in aqueous zinc ion battery, *J. Energy Storage*, 2023, **68**, 107655.
3. M. Qiu, P. Sun, Y. Wang, L. Ma, C. Zhi and W. Mai, Anion-Trap Engineering toward Remarkable Crystallographic Reorientation and Efficient Cation Migration of Zn Ion Batteries, *Angew. Chem. Int. Ed.*, 2022, **61**, e202210979.
4. A. Bayaguud, X. Luo, Y. Fu and C. Zhu, Cationic Surfactant-Type Electrolyte Additive Enables Three-Dimensional Dendrite-Free Zinc Anode for Stable Zinc-Ion Batteries, *ACS Energy Lett.*, 2020, **5**, 3012-3020.
5. Q. Zhang, J. Luan, X. Huang, Q. Wang, D. Sun, Y. Tang, X. Ji and H. Wang, Revealing the role of crystal orientation of protective layers for stable zinc anode, *Nat. Commun.*, 2020, **11**, 3961.
6. D. Liu, X. Song, Z. Liu, L. Cheng and Z. Jiang, Heteroatom-free cyclic ether enables synergistic

optimization of solvation and hydrogen-bonding in aqueous zinc batteries, *J. Colloid Interface Sci.*, 2026, **706**, 139766.

7. C. Huang, X. Zhao, S. Liu, Y. Hao, Q. Tang, A. Hu, Z. Liu and X. Chen, Stabilizing Zinc Anodes by Regulating the Electrical Double Layer with Saccharin Anions, *Adv. Mater.*, 2021, **33**, 2100445.

8. X. Liu, L. Yue, W. Dong, Y. Qu, X. Sun and L. Chen, Sodium Citrate Electrolyte Additive to Improve Zinc Anode Behavior in Aqueous Zinc-Ion Batteries, *Batteries*, 2024, **10**, 97.

9. X. Fan, L. Chen, Y. Wang, X. Xu, X. Jiao, P. Zhou, Y. Liu, Z. Song and J. Zhou, Selection of Negative Charged Acidic Polar Additives to Regulate Electric Double Layer for Stable Zinc Ion Battery, *Nano-Micro Lett.*, 2024, **16**, 270.

10. C. Deng, X. Xie, J. Han, Y. Tang, J. Gao, C. Liu, X. Shi, J. Zhou and S. Liang, A Sieve-Functional and Uniform-Porous Kaolin Layer toward Stable Zinc Metal Anode, *Adv. Funct. Mater.*, 2020, **30**, 2000599.

11. L. Cao, D. Li, E. Hu, J. Xu, T. Deng, L. Ma, Y. Wang, X.-Q. Yang and C. Wang, Solvation Structure Design for Aqueous Zn Metal Batteries, *J. Am. Chem. Soc.*, 2020, **142**, 21404-21409.

12. K. Wang, H. Zhan, W. Su, X.-X. Liu and X. Sun, Ordered interface regulation at Zn electrodes induced by trace gum additives for high-performance aqueous batteries, *Energy Environ. Sci.*, 2025, **18**, 1398-1407.

13. J. Hao, B. Li, X. Li, X. Zeng, S. Zhang, F. Yang, S. Liu, D. Li, C. Wu and Z. Guo, An In-Depth Study of Zn Metal Surface Chemistry for Advanced Aqueous Zn-Ion Batteries, *Adv. Mater.*, 2020, **32**, 2003021.

14. R. Qin, Y. Wang, M. Zhang, Y. Wang, S. Ding, A. Song, H. Yi, L. Yang, Y. Song, Y. Cui, J. Liu, Z. Wang, S. Li, Q. Zhao and F. Pan, Tuning Zn<sup>2+</sup> coordination environment to suppress dendrite formation for high-performance Zn-ion batteries, *Nano Energy*, 2021, **80**, 105478.
